# Supplementary material
Source: publisher figshare collection journal article supplement (https://frontiersin.figshare.com/ndownloader/files/35065648)
Supplement: Supplementary file [file 35065648]

**Anemoside B4 inhibits vascular smooth muscle cell proliferation, migration, and  
neointimal hyperplasia**

Dan Shan<sup>1,2,3</sup>, Ping Qu<sup>2</sup>, Chao Zhong<sup>1,2</sup>, Luling He<sup>1</sup>, Qingshan Zhang<sup>3</sup>, Guoyue Zhong<sup>4</sup>, Wenhui  
Hu<sup>2</sup>, Yulin Feng<sup>5</sup>, Shilin Yang<sup>5</sup>, Xiao-feng Yang<sup>2</sup>, Jun Yu<sup>2,\*</sup>

<sup>1</sup>Center for Translational Medicine, Jiangxi University of Traditional Chinese Medicine,  
Nanchang, Jiangxi 330002, China;

<sup>2</sup>Department of Cardiovascular Sciences and Center for Metabolic Disease Research, Lewis Katz  
School of Medicine, Temple University, Philadelphia, PA 19140, USA;

<sup>3</sup>Affiliated Hospital of Inner Mongolia University for the Nationalities, Tongliao, Inner  
Mongolia 028000, China;

<sup>4</sup>Research Center of Natural Resources of Chinese Medicinal Materials and Ethnic Medicine,  
Jiangxi University of Traditional Chinese Medicine, Nanchang, Jiangxi 330002, China;

<sup>5</sup>The National Pharmaceutical Engineering Center (NPEC) for Solid Preparation in Chinese  
Herbal Medicine, Nanchang, Jiangxi 330006, China.

\*Correspondence

Jun Yu, MD

Department of Cardiovascular Sciences and Center for Metabolic Disease Research,  
Lewis Katz School of Medicine, Temple University  
Philadelphia, PA 19140, USA

Tel: +1-215-707-3286

Email: [jun.yu@temple.edu](mailto:jun.yu@temple.edu)

## Supplementary Figure 1

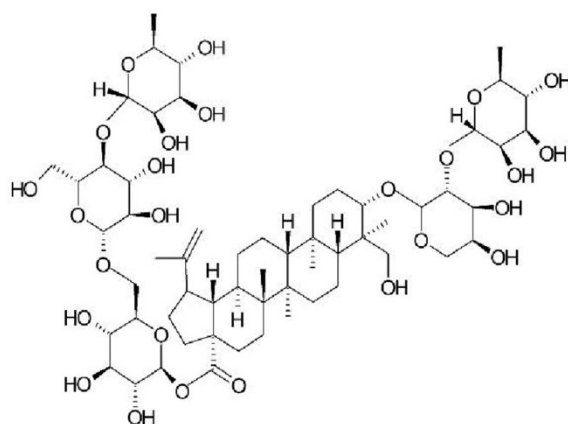

**Supplementary Figure 1. The chemical structure of Anemoside B4.**

## Supplementary Figure 2

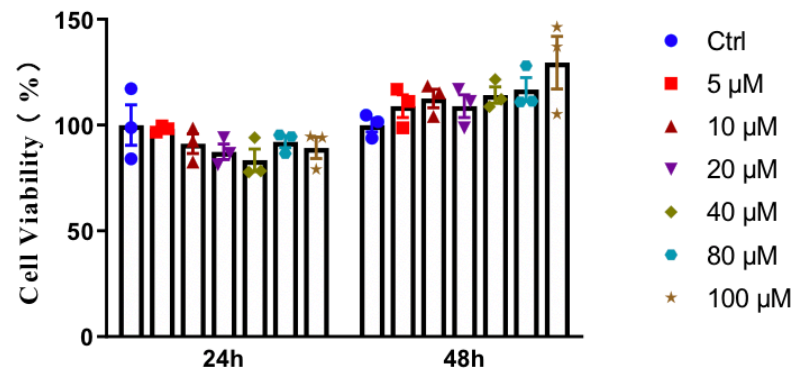

**Supplementary Figure 2. Animoside B4 does not influence VSMC viability.** MVSMCs were grown to reach confluency. Cell viability was measured by MTT assays at 24 and 48 hours. Data shown are means  $\pm$  SEM. N = 3. \*P < 0.05 compared with control group. All experiments were repeated at least for 3 times.

### Supplementary Figure 3

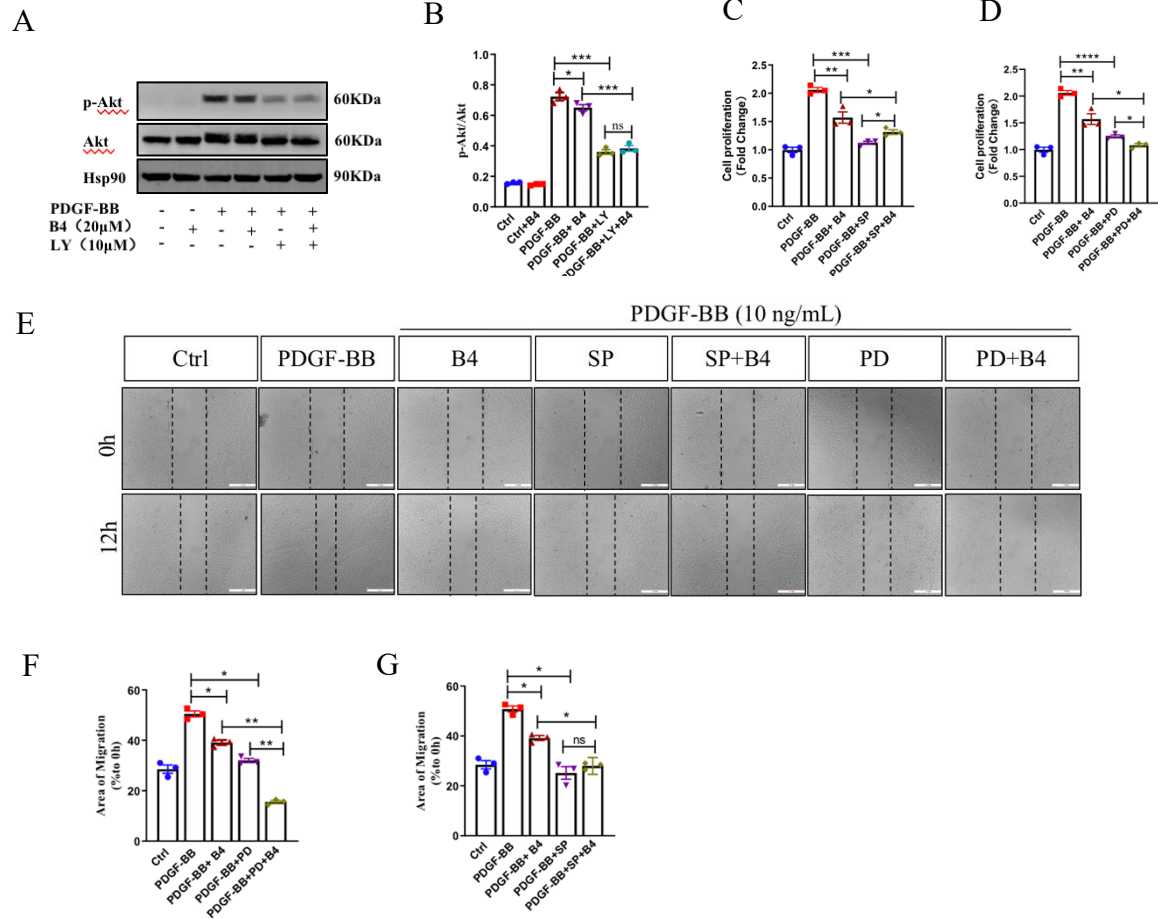

**Supplementary Figure 3. B4 inhibits PDGF-BB-induced PI3K/Akt and p-38 MAPK, but not ERK or JNK signaling pathway.** (A) Western blot of p-Akt and total Akt from MVSMCs treated with PDGF-BB, PDGF-BB + B4 with or without LY294002. (B) Bar graph showing the densitometry analysis of phosphorylated Akt protein normalized to the total Akt levels. N=3 for each condition. (C-D) Quiescent MVSMCs were treated with B4 (20 μM) for 24 hours and incubated with SP600125 (20 μM), PD98059 (50 μM), in combination of B4 (20 μM), or vehicle 48 hours. Cell proliferation was determined by MTT assay. (E) Cells migration was determined by scratch wound assay. (F-G) Quantification for the number of migrated cells. Data shown are means ± SEM. \*P < 0.05; \*\*P < 0.01; \*\*\* P < 0.001; \*\*\*\* P < 0.0001. All experiments were repeated at least for 3 times.

**Supplementary Table 1: Antibody list**

| <b>Antibody</b> | <b>Company</b> | <b>Catalog #</b> | <b>Species</b> | <b>Dilution</b> | <b>Application</b> |
|-----------------|----------------|------------------|----------------|-----------------|--------------------|
| Hsp90           | BD             | 610419           | Mouse          | 1:1000          | Western            |
| p-Akt(Ser473)   | Cell Signaling | 4051             | Mouse          | 1:1000          | Western            |
| Akt             | Cell Signaling | 4685             | Rabbit         | 1:1000          | Western            |
| p-Erk           | Cell Signaling | 4377             | Rabbit         | 1:1000          | Western            |
| Erk             | Cell Signaling | 4696             | Mouse          | 1:1000          | Western            |
| p-p38           | Cell Signaling | 9216             | Mouse          | 1:500           | Western            |
| p38             | Cell Signaling | 9212             | Rabbit         | 1:500           | Western            |
| p-JNK           | Cell Signaling | 4668             | Rabbit         | 1:1000          | Western            |
| JNK             | Santa Cruz     | sc-7345          | Mouse          | 1:500           | Western            |
| Calponin        | Abcam          | ab46794          | Rabbit         | 1:2000          | Western            |
| SM22a           | Abcam          | ab14106          | Rabbit         | 1:1000          | Western            |
| SMA             | DAKO           | M0851            | Mouse          | 1:1000          | Western            |
| IRDYE 680RD     | Odyssey        | 926-68073        | Rabbit         | 1:5000          | Western            |
| IRDYE 800CW     | Odyssey        | 926-32212        | Mouse          | 1:5000          | Western            |
| Anti-BrdU       | Abcam          | ab6326           | Rat            | 1:40            | IF                 |

**Supplementary Table 2: Other reagent list**

| <b>Reagents</b>                                  | <b>Company</b>                                                                          | <b>Cat log#</b> |
|--------------------------------------------------|-----------------------------------------------------------------------------------------|-----------------|
| Anemoside B4                                     | Chinese National Institute for the Control of<br>Pharmaceutical and Biological Products | 20170522        |
| LY294002                                         | Sigma-Aldrich                                                                           | L9908           |
| PD98059                                          | Sigma-Aldrich                                                                           | P215            |
| SB203580                                         | Sigma-Aldrich                                                                           | S8307           |
| SP600125                                         | Sigma-Aldrich                                                                           | S5567           |
| TUNEL Andy Fluor™ 488<br>Apoptosis Detection Kit | Roche                                                                                   | A050            |

**Supplement Table 3: Primer list**

| <b>Primer</b>                  | <b>Forward</b>         | <b>Revers</b>           | <b>Species</b> |
|--------------------------------|------------------------|-------------------------|----------------|
| <b>18s</b>                     | TTCCGATAACGAACGAGACTCT | TGGCTGAACGCCACTTGTC     | Mouse          |
| <b>SMA</b>                     | GTCCCAGACATCAGGGAGTAA  | TCGGATACTTCAGCGTCAGGA   | Mouse          |
| <b>Calponin</b>                | TCTGCACATTTTAACCGAGGTC | GCCAGCTTGTTCTTTACTTCAGC | Mouse          |
| <b>SM22<math>\alpha</math></b> | CAACAAGGGTCCATCCTACGG  | ATCTGGGCGGCCTACATCA     | Mouse          |
| <b>Myocardin</b>               | AAGGTCCATTCCAAGTCTGCTC | CCATCTCTACTGCTGTCATCC   | Mouse          |
| <b>KLF4</b>                    | CTTTCCTGCCAGACCAGATG   | GGTTTCTCGCCTGTGTGAGT    | Mouse          |
